# Supplementary material for: Boric acid in magnetized water: clean and powerful media for synthesis of 3,4-dihydropyrimidin-2(1H)-ones
Source: Royal Society of Chemistry journal article supplement (doi:10.1039/d1ra03769b), 2021-01-01

## *Supporting Information*

### **Boric Acid in Magnetized Water: Clean and Powerful Media for Synthesis of 3,4-dihydropyrimidin-2(1H)-ones**

Vahid Khakyzadeh,<sup>a\*</sup> Ahmad Reza Moosavi-Zare<sup>b</sup> Sahra Sheikholeslami,<sup>a</sup> Amir Ehsani,<sup>a</sup> Salbin

Sediqi,<sup>a</sup> Mohammad Rezaei-Gohar,<sup>a</sup> Zahra Jalilian.<sup>c</sup>

<sup>a</sup> Department of Chemistry, K. N. Toosi University of Technology, P.O. Box 16315-1618, 15418 Tehran, Iran

<sup>b</sup> Hamedan University of Technology, Department of Chemistry, Hamedan, 65155, Iran.

<sup>c</sup> Chemistry Department, College of Science, University of Kurdistan, Pasdaran Street, 66177-15177, Sanandaj, Iran.

Email: [v.khakyzadeh@kntu.ac.ir](mailto:v.khakyzadeh@kntu.ac.ir)

---

#### **Table of Contents**

|                                      |   |
|--------------------------------------|---|
| General methods .....                | 2 |
| The UV spectrum (S1).....            | 2 |
| FT-IR spectrum (S2).....             | 3 |
| Selected Data of Compounds (S3)..... | 4 |
| NMR Spectra of Compounds (S4).....   | 6 |

**General Methods.** All chemicals were purchased from Merck or Fluka Chemical Companies. The known products were identified by comparison of their melting points and spectral data with those in the authentic samples. The  $^1\text{H}$  NMR (250 MHz) and  $^{13}\text{C}$  NMR (62.5 MHz) were run on a Bruker Avance DPX-250 FT-NMR spectrometer ( $\delta$  in ppm). Melting points were recorded on a Büchi B-545 apparatus in open capillary tubes. Tetra-test-kit (Tetra®) was used to measure the amount of dissolved oxygen in magnetic water and ordinary water. The pH changes of the water were measured by Canaway's pH meter at different temperatures.

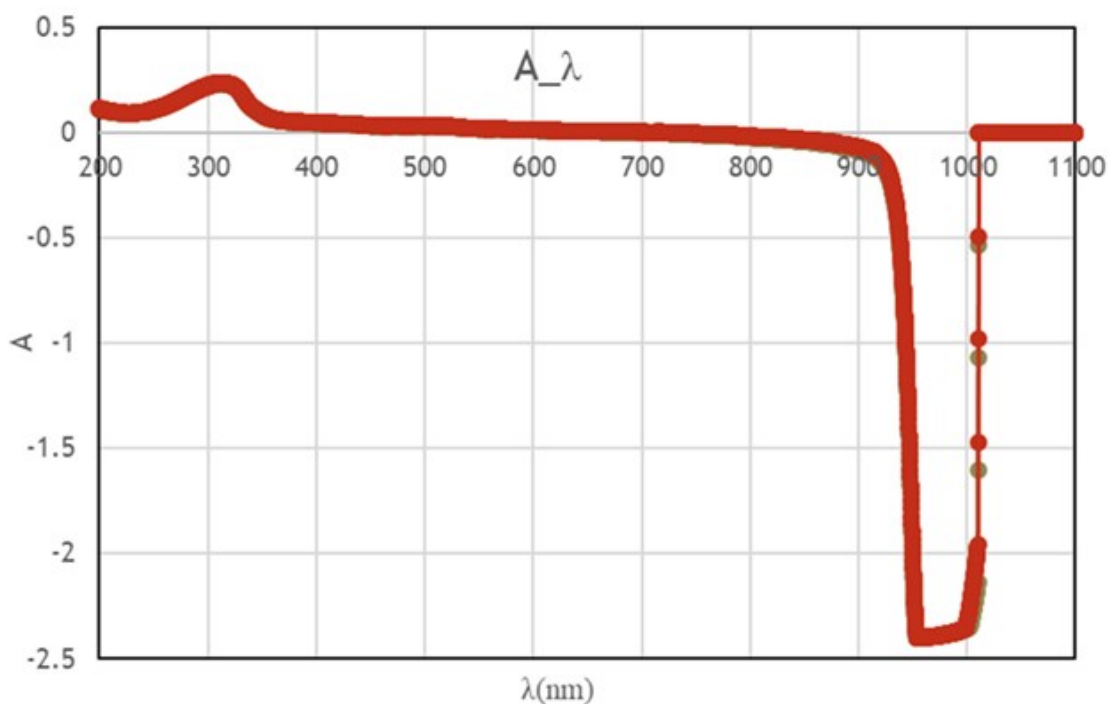

**S1.** The UV spectrum of magnetized and distilled water.

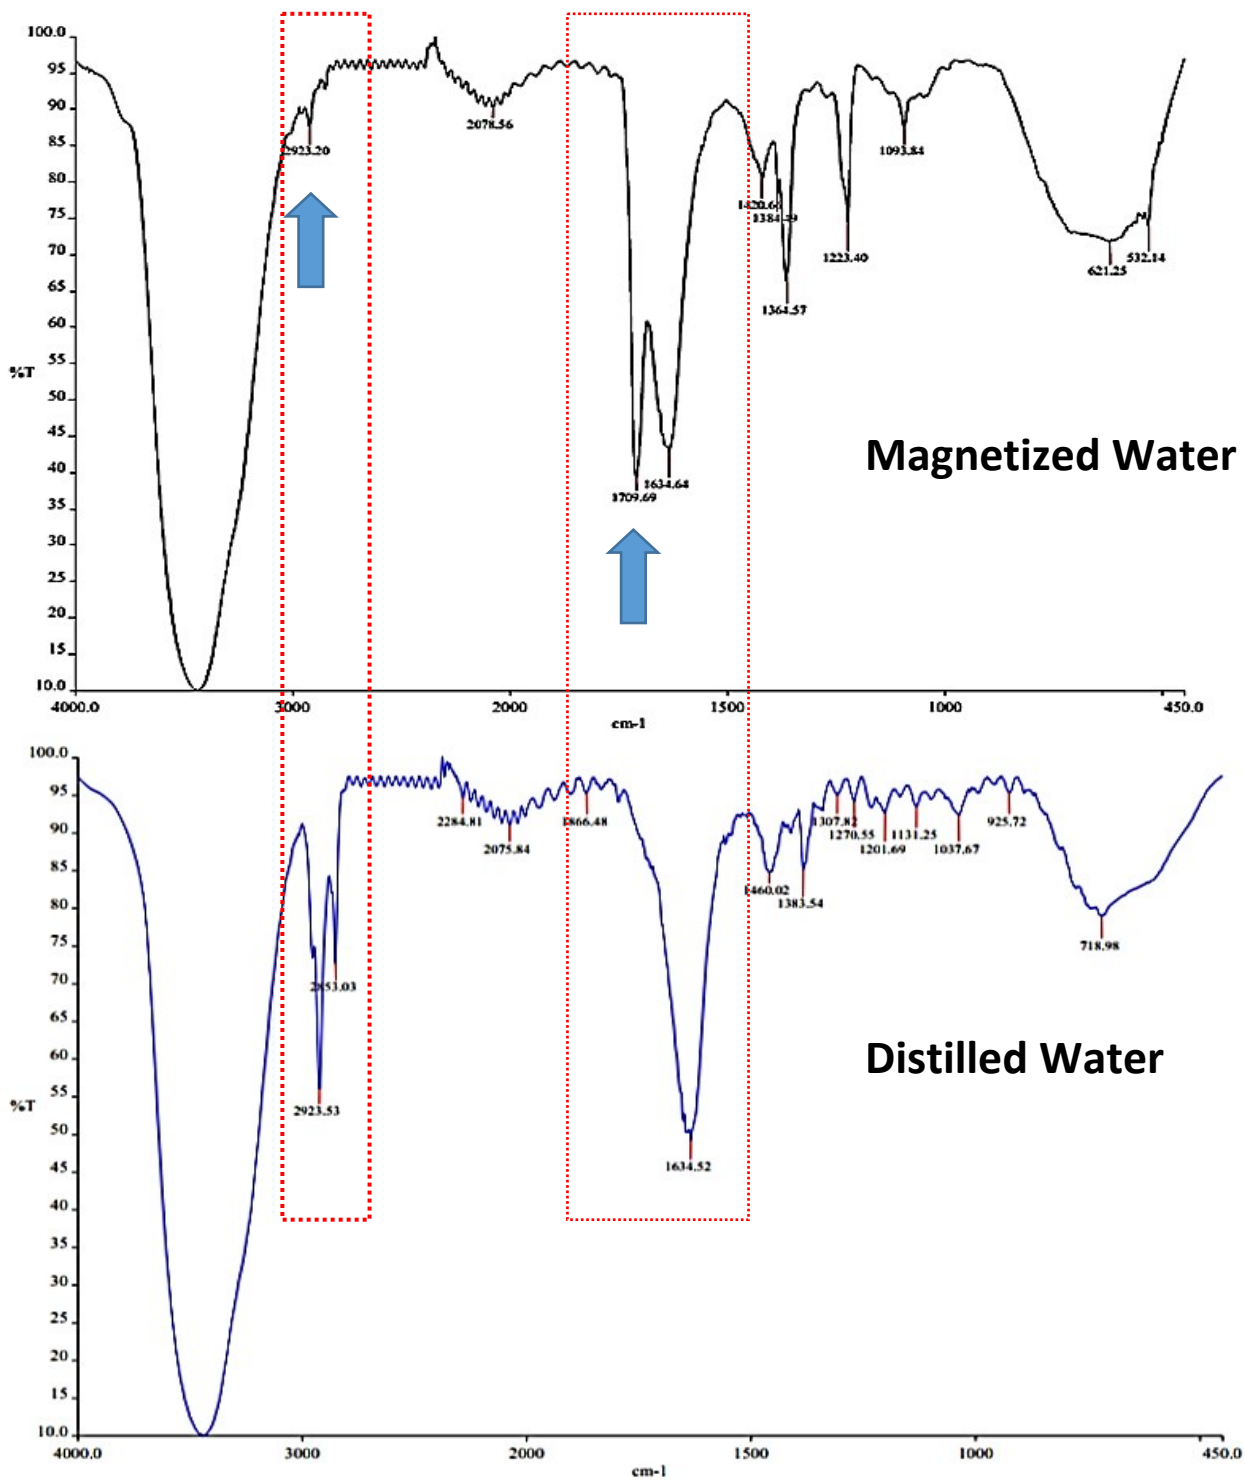

S2. FT-IR spectroscopy of magnetized and distilled water.

### S3. Selected Data of Compounds:

#### **Ethyl 4-(4-(benzyloxy)phenyl)-6-methyl-2-oxo-1,2,3,4-tetrahydropyrimidine-5-carboxylate:**

Mp 200-202 °C; <sup>1</sup>H NMR: (250 MHz, DMSO-*d*<sub>6</sub>) δ = 1.04-1.09 (t, *J* = 6.75 Hz, 3H, CH<sub>3</sub>), 2.21 (s, 3H, CH<sub>3</sub>), 3.93-3.99 (m, 2H, CH<sub>2</sub>), 5.04 (s, 3H), 6.91-6.94 (d, *J*=8.0 Hz, 2H), 7.10-7.13 (d, *J*=8.0 Hz, 2H), 7.32-7.38 (m, 5H), 7.65 (s, 1H), 9.13 (s, 1H); <sup>13</sup>C NMR (62.5 MHz, DMSO-*d*<sub>6</sub>) δ 14.5, 18.1, 53.7, 59.5, 69.6, 100.0, 115.0, 127.8, 128.0, 128.8, 137.7, 148.4, 152.6.

#### **Ethyl 6-methyl-2-oxo-4-phenyl-1,2,3,4-tetrahydropyrimidine-5-carboxylate**

Mp 204-207 °C; <sup>1</sup>H NMR (250 MHz, DMSO-*d*<sub>6</sub>) δ 9.13 (d, *J* = 2.1 Hz, 1H), 7.67 (dd, *J* = 3.5, 2.1 Hz, 1H), 7.24 (dd, *J* = 8.1, 6.9 Hz, 2H), 7.18 – 7.11 (m, 3H), 5.07 (d, *J* = 3.3 Hz, 1H), 3.90 (q, *J* = 7.1 Hz, 2H), 2.17 (s, 3H), 1.01 (t, *J* = 7.1 Hz, 3H). <sup>13</sup>C NMR (62.5 MHz, DMSO-*d*<sub>6</sub>) δ 165.94, 152.77, 148.97, 145.47, 129.00, 127.87, 126.86, 99.86, 59.81, 54.58, 18.41, 14.69.

#### **Ethyl 6-methyl-2-oxo-4-(p-tolyl)-1,2,3,4-tetrahydropyrimidine-5-carboxylate**

Mp 203-204 °C; <sup>1</sup>H NMR (250 MHz, DMSO-*d*<sub>6</sub>) δ 9.17 (d, *J* = 2.0 Hz, 1H), 7.70 (dd, *J* = 3.5, 2.1 Hz, 1H), 7.13 (s, 4H), 5.22 – 5.00 (m, 1H), 4.06 – 3.79 (m, 2H), 2.35 – 2.16 (m, 6H), 1.12 (t, *J* = 7.1 Hz, 3H). <sup>13</sup>C NMR (62.5 MHz, DMSO-*d*<sub>6</sub>) δ 165.85, 152.68, 148.62, 142.44, 136.85, 129.37, 126.63, 99.91, 59.69, 54.11, 21.12, 18.24, 14.57.

#### **Ethyl 4-(4-hydroxyphenyl)-6-methyl-2-oxo-1,2,3,4-tetrahydropyrimidine-5-carboxylate**

Mp 210-213 °C; <sup>1</sup>H NMR (250 MHz, DMSO-*d*<sub>6</sub>) δ 9.33 (s, 1H), 9.11 (d, *J* = 2.1 Hz, 1H), 7.62 (dd, *J* = 3.4, 2.0 Hz, 1H), 7.11 – 6.90 (m, 2H), 6.76 – 6.59 (m, 2H), 5.04 (d, *J* = 3.2 Hz, 1H), 3.97 (q, *J* = 7.1 Hz, 2H), 2.23 (s, 3H), 1.09 (t, *J* = 7.1 Hz, 3H). <sup>13</sup>C NMR (62.5 MHz, DMSO-*d*<sub>6</sub>) δ 165.86, 156.98, 152.64, 148.18, 135.88, 127.85, 115.43, 100.20, 59.56, 53.89, 40.43, 40.26, 40.09, 39.93, 39.76, 39.59, 39.42, 18.19, 14.55.

**Ethyl 4-(4-(dimethylamino)phenyl)-6-methyl-2-oxo-1,2,3,4-tetrahydropyrimidine-5-carboxylate**

Mp 259-260 °C; <sup>1</sup>H NMR (250 MHz, DMSO-*d*<sub>6</sub>) δ 9.10 (d, *J* = 2.0 Hz, 1H), 7.60 (dd, *J* = 3.5, 2.1 Hz, 1H), 7.20 – 6.90 (m, 2H), 6.78 – 6.46 (m, 2H), 5.05 (d, *J* = 3.3 Hz, 1H), 3.99 (qd, *J* = 7.1, 1.9 Hz, 2H), 2.86 (s, 6H), 2.24 (s, 3H), 1.13 (t, *J* = 7.1 Hz, 3H). <sup>13</sup>C NMR (62.5 MHz, DMSO-*d*<sub>6</sub>) δ 165.97, 152.78, 150.24, 148.02, 133.13, 127.36, 112.70, 100.38, 59.57, 53.78, 18.21, 14.62.

## NMR Spectra of Compounds (S4)

Ethyl 4-(4-(benzyloxy)phenyl)-6-methyl-2-oxo-1,2,3,4-tetrahydropyrimidine-5-carboxylate

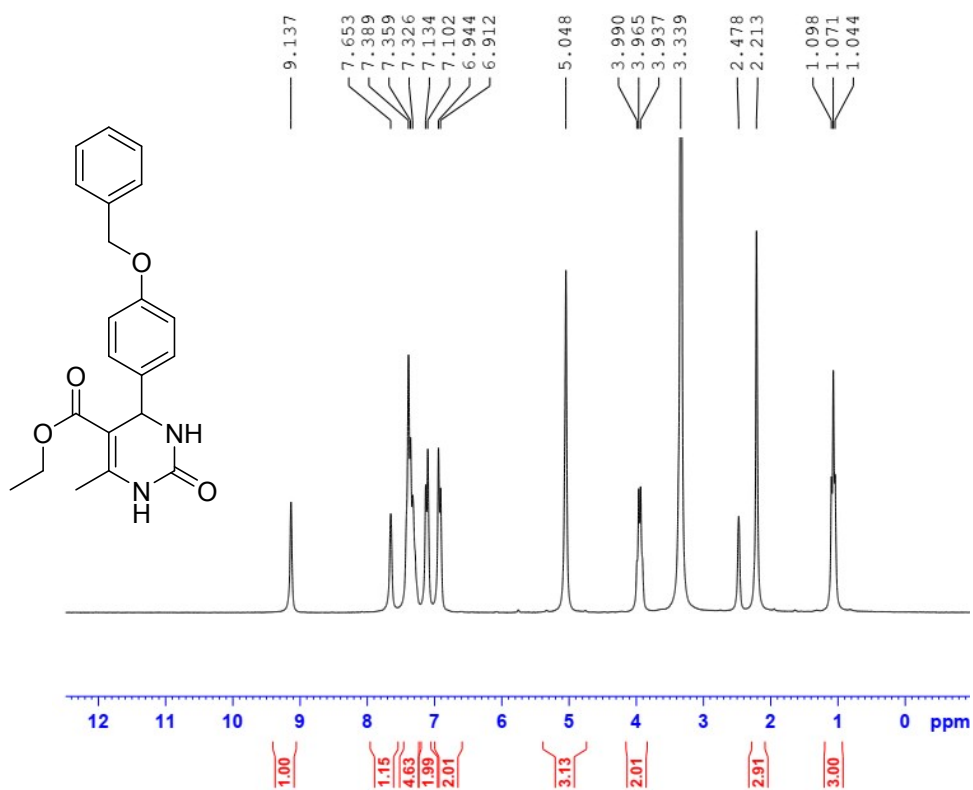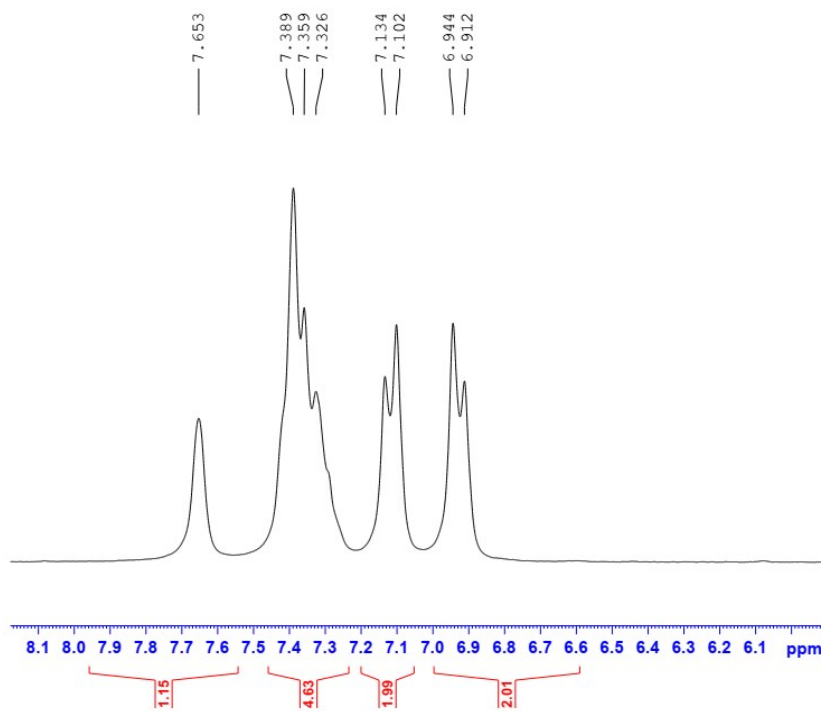

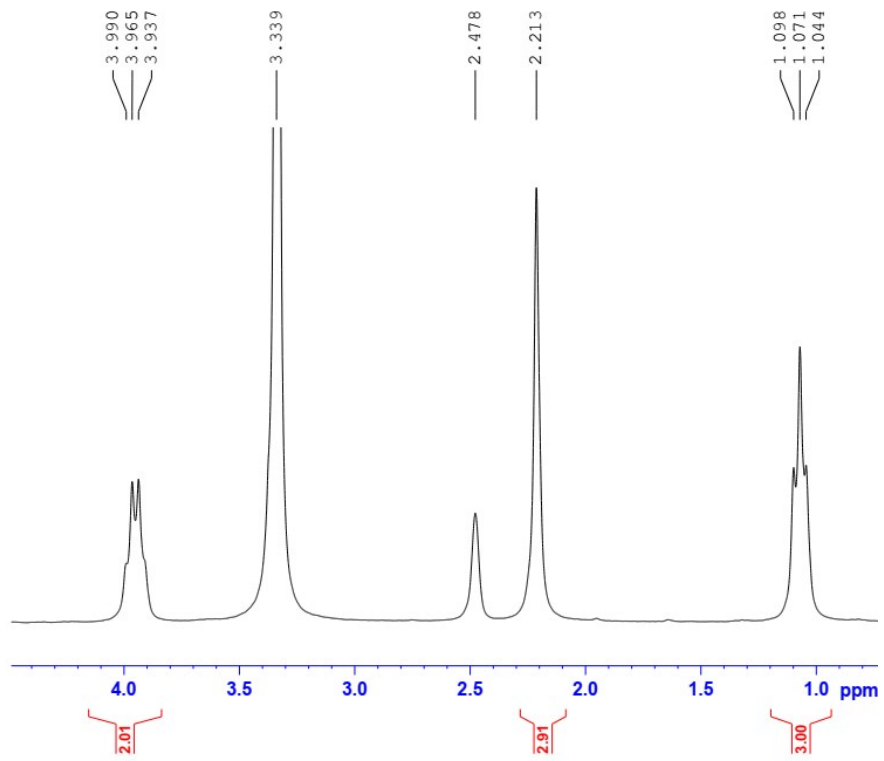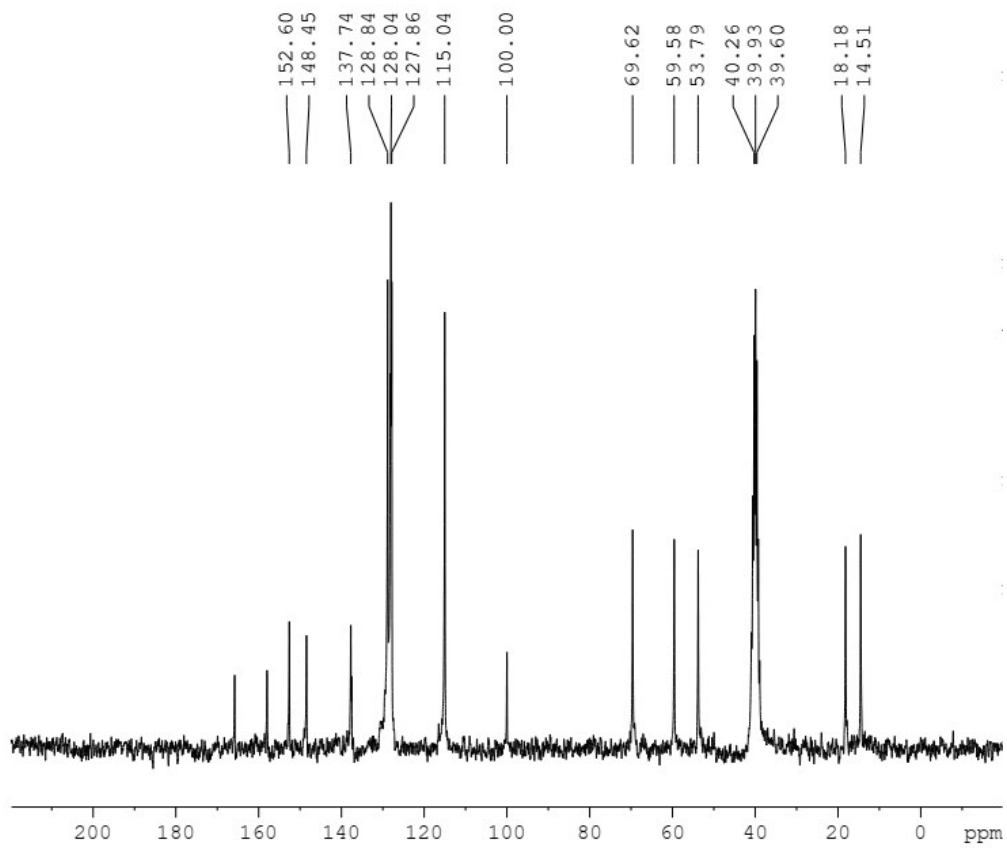

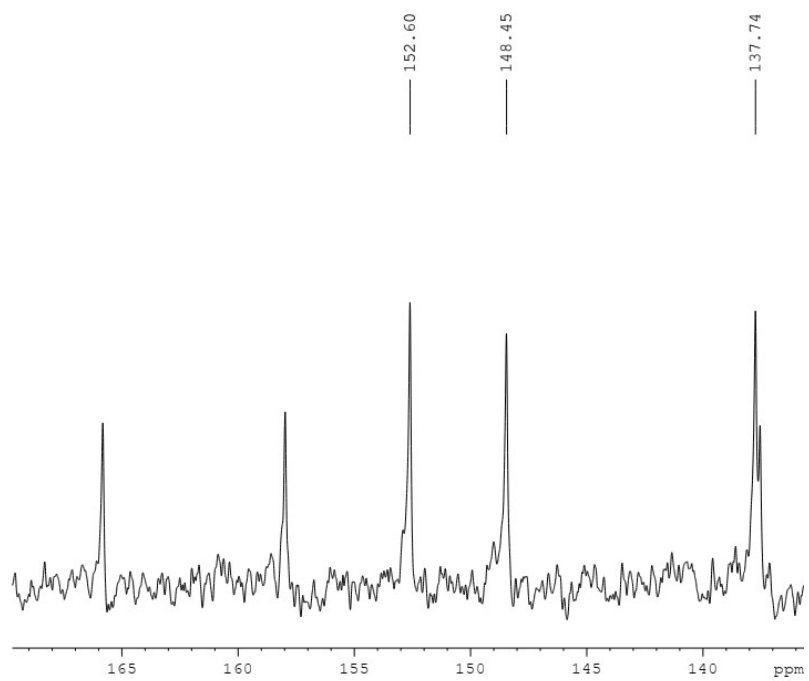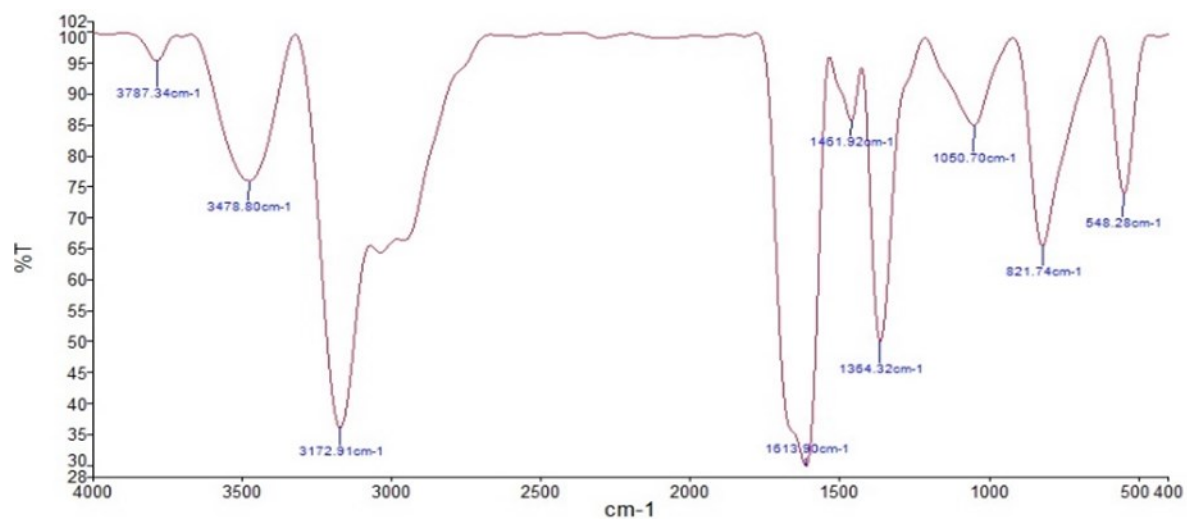



# Ethyl 6-methyl-2-oxo-4-phenyl-1,2,3,4-tetrahydropyrimidine-5-carboxylate

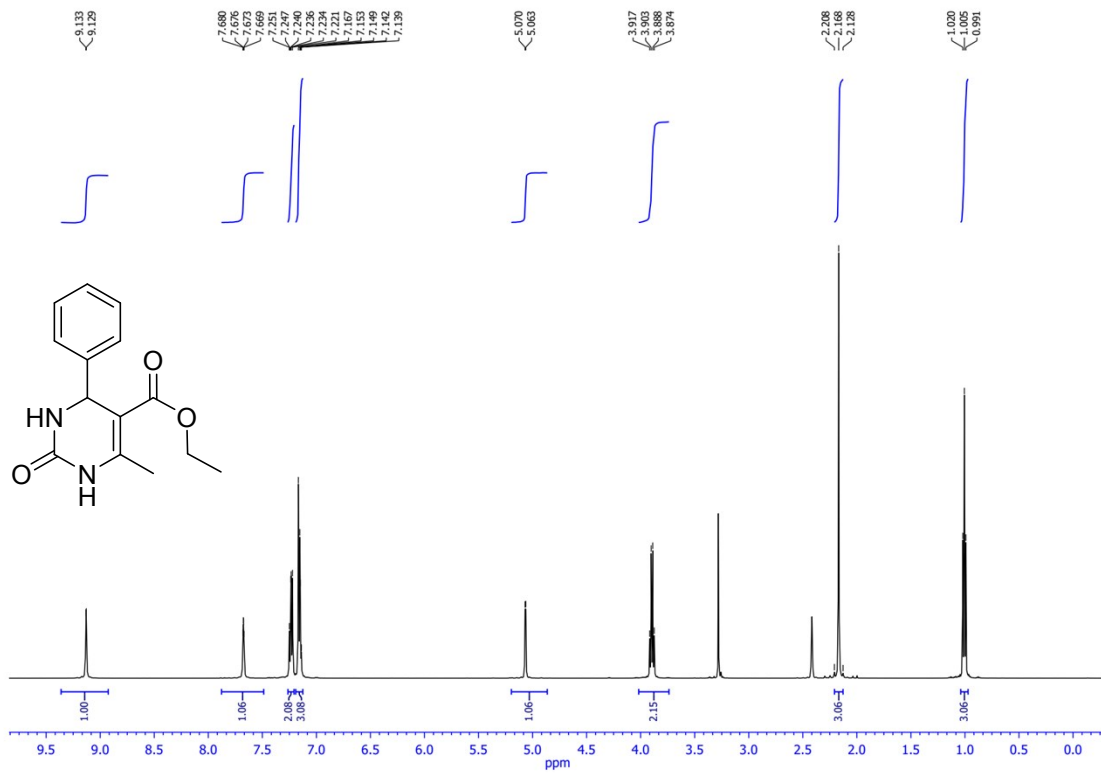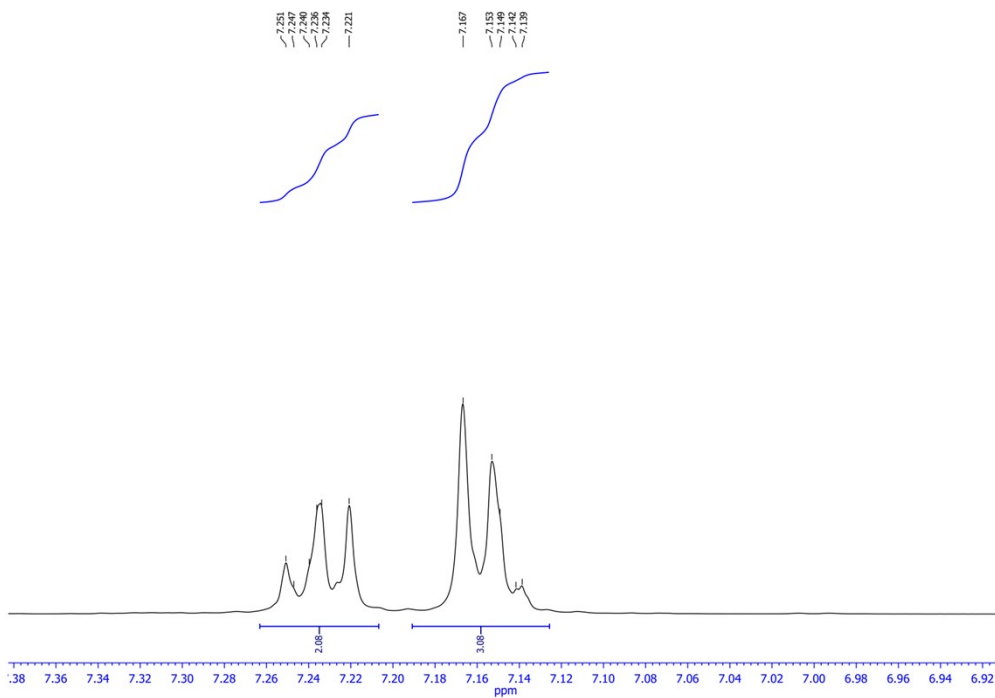

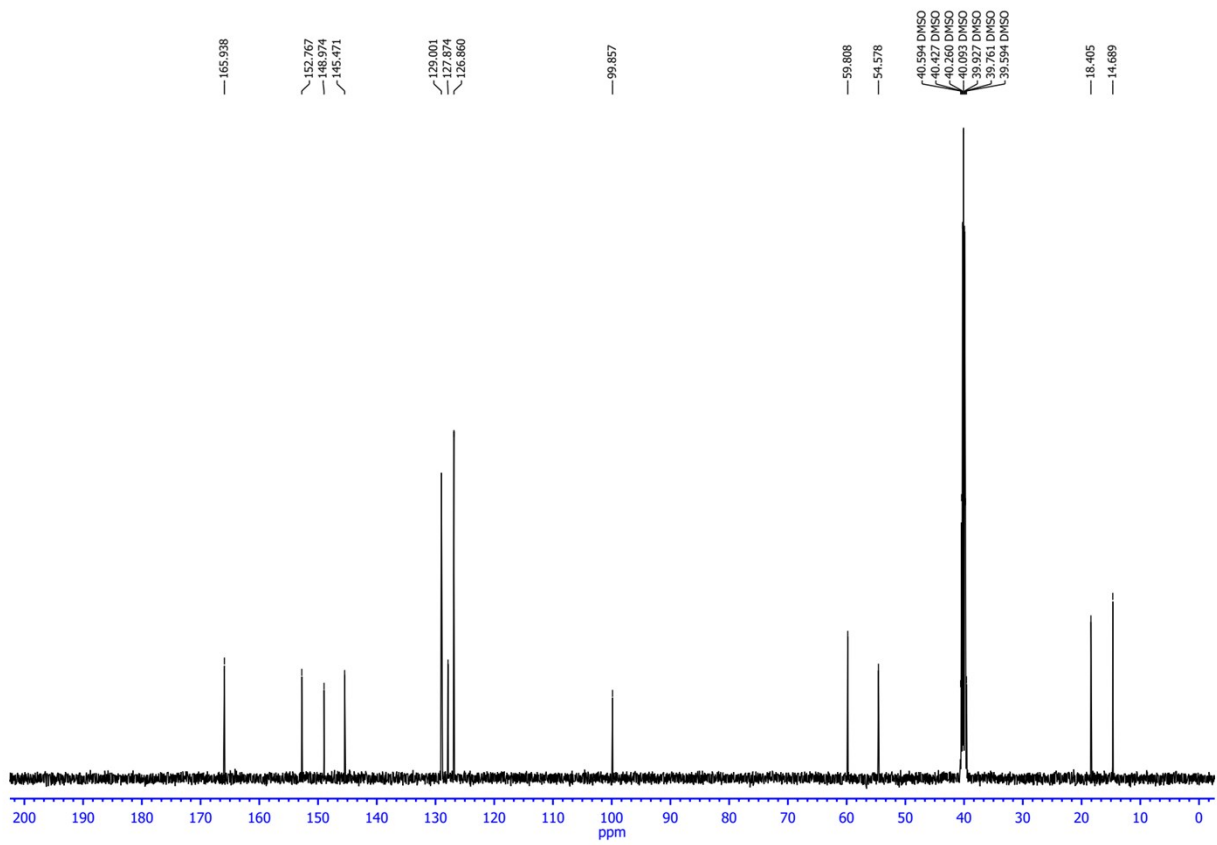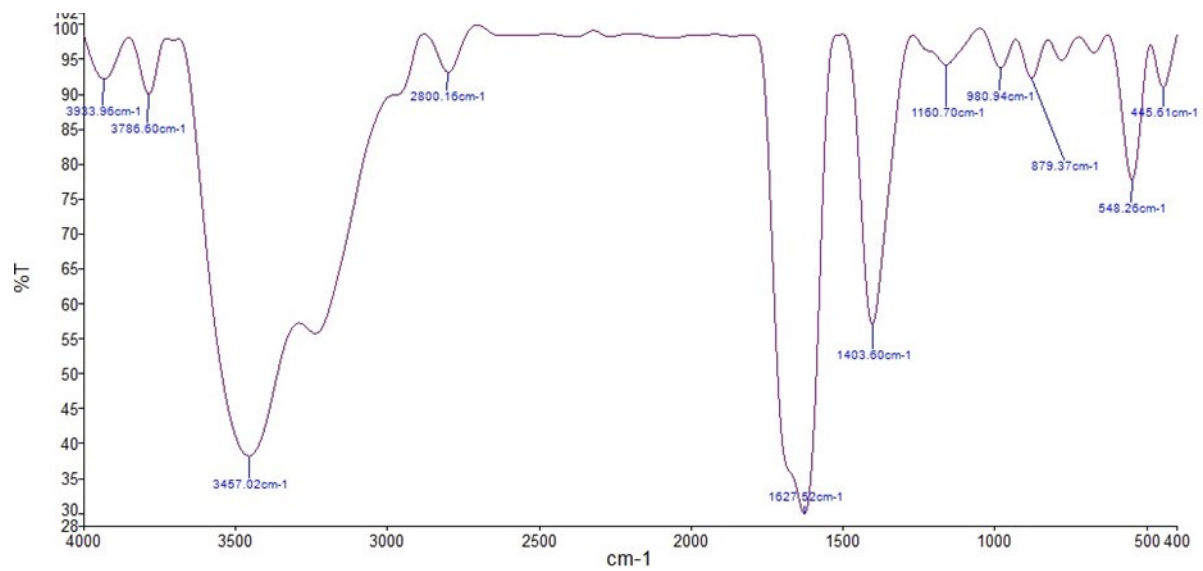

Ethyl 6-methyl-2-oxo-4-(p-tolyl)-1,2,3,4-tetrahydropyrimidine-5-carboxylate

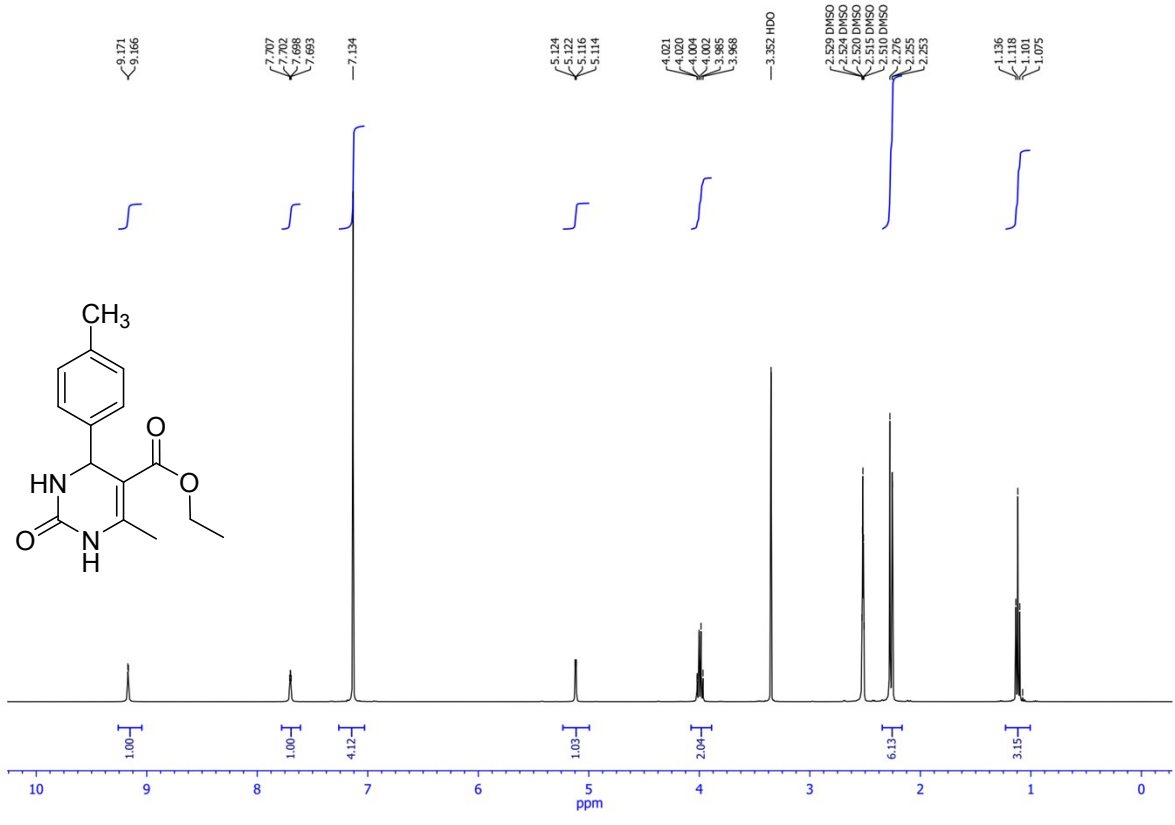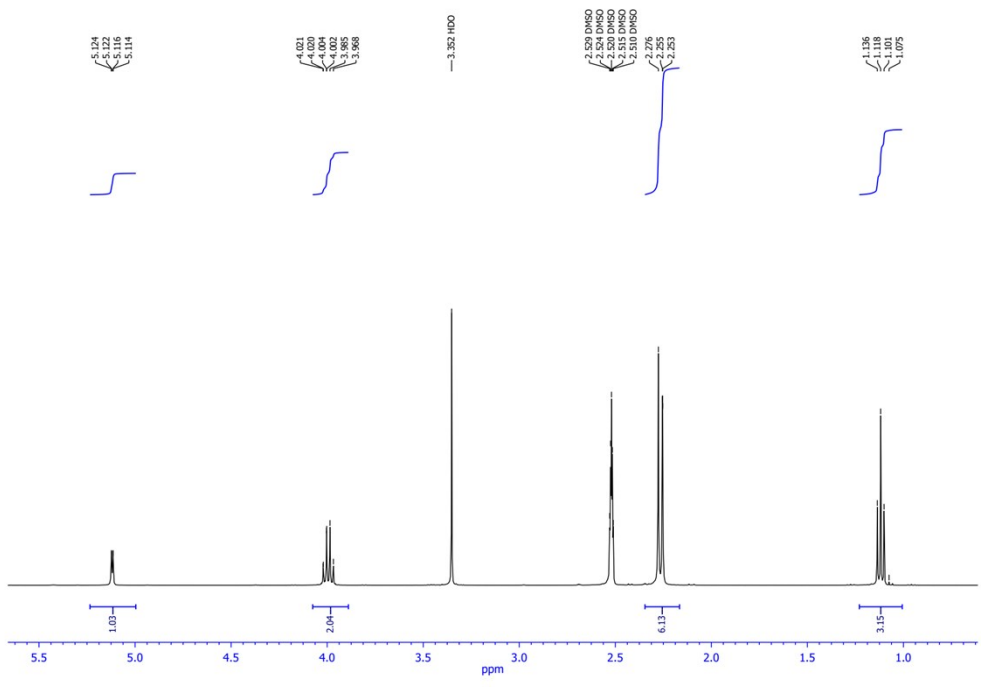

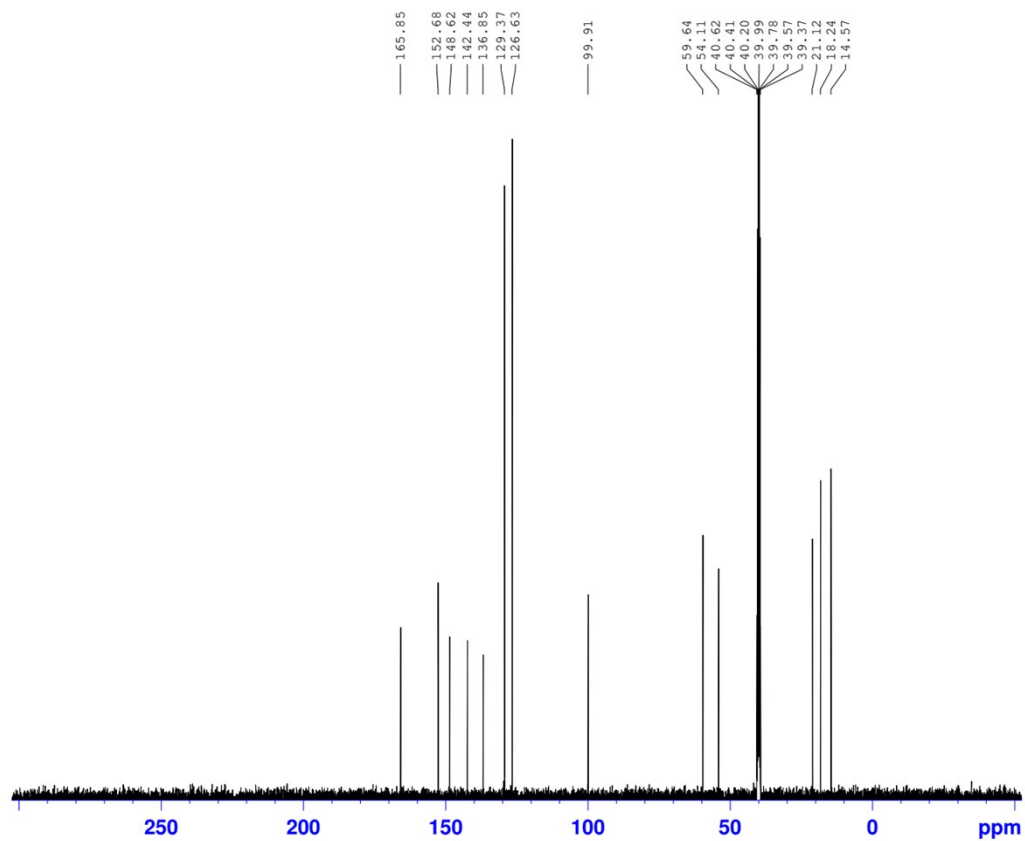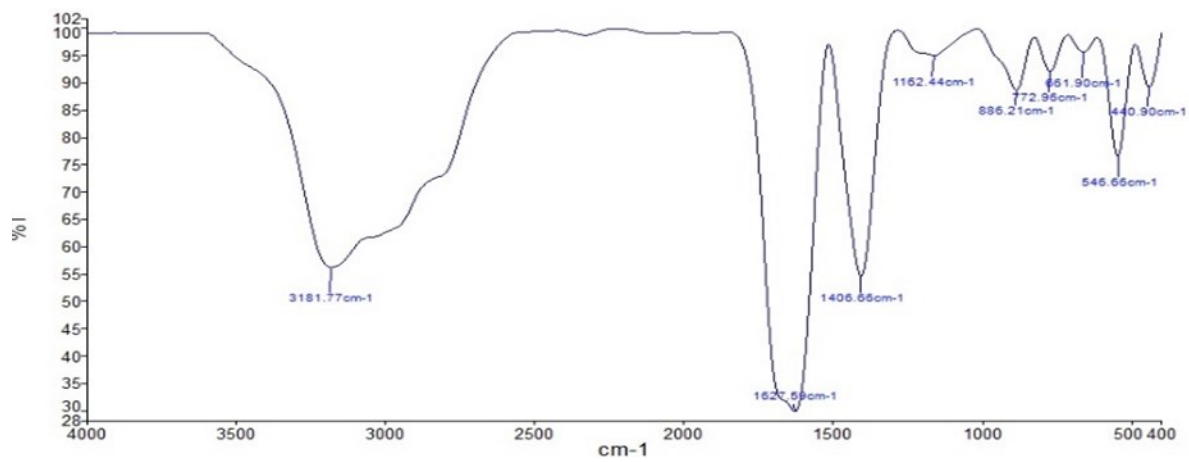

Ethyl 4-(4-hydroxyphenyl)-6-methyl-2-oxo-1,2,3,4-tetrahydropyrimidine-5-carboxylate

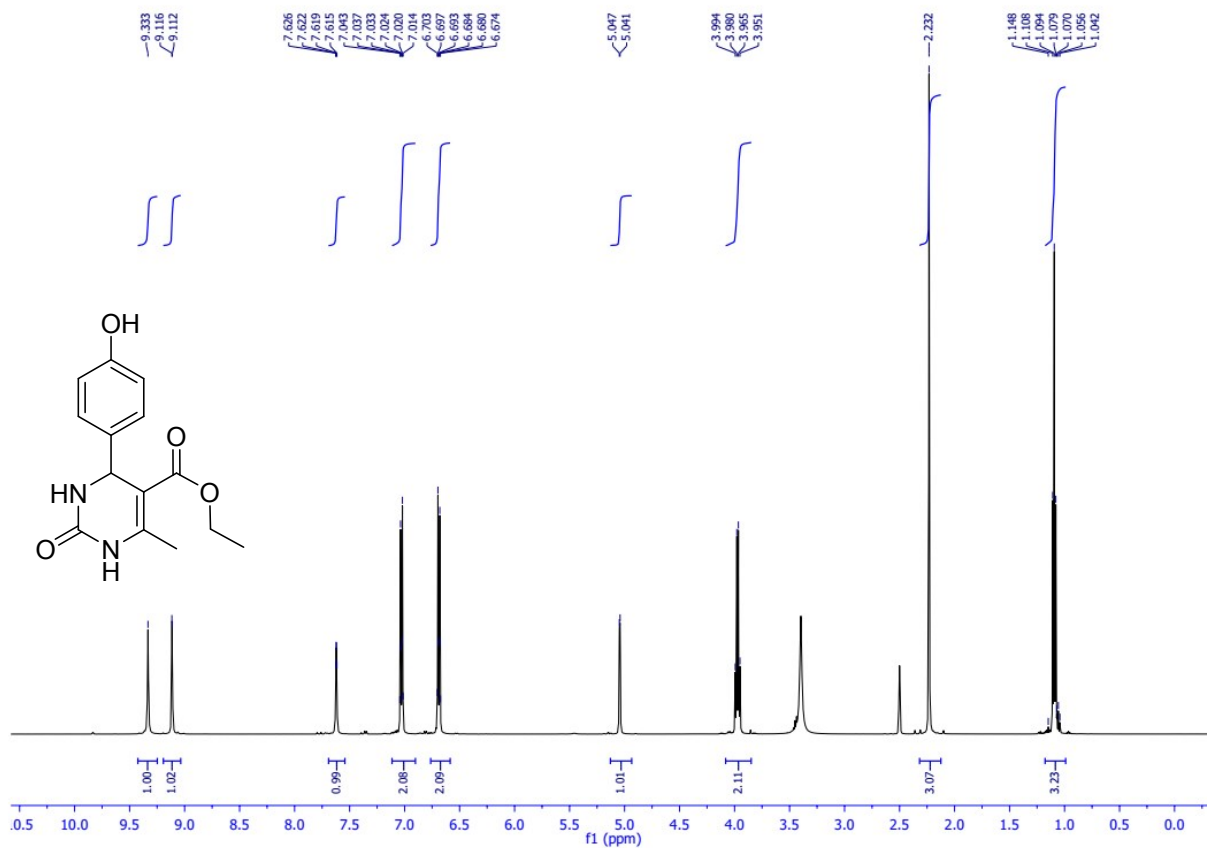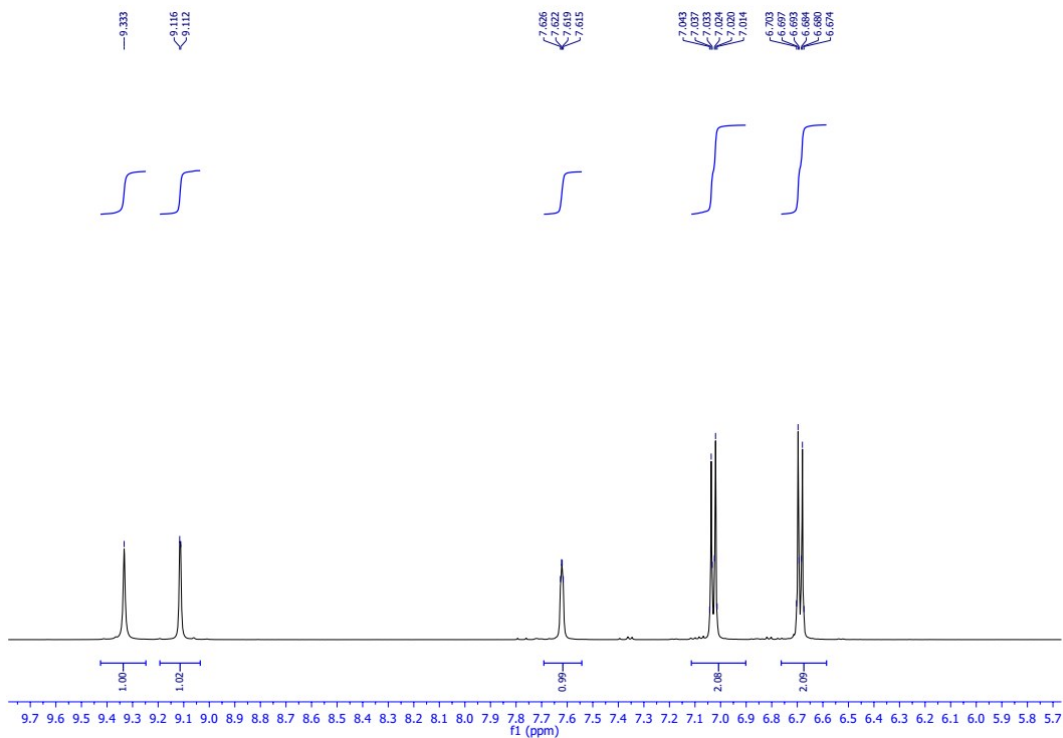

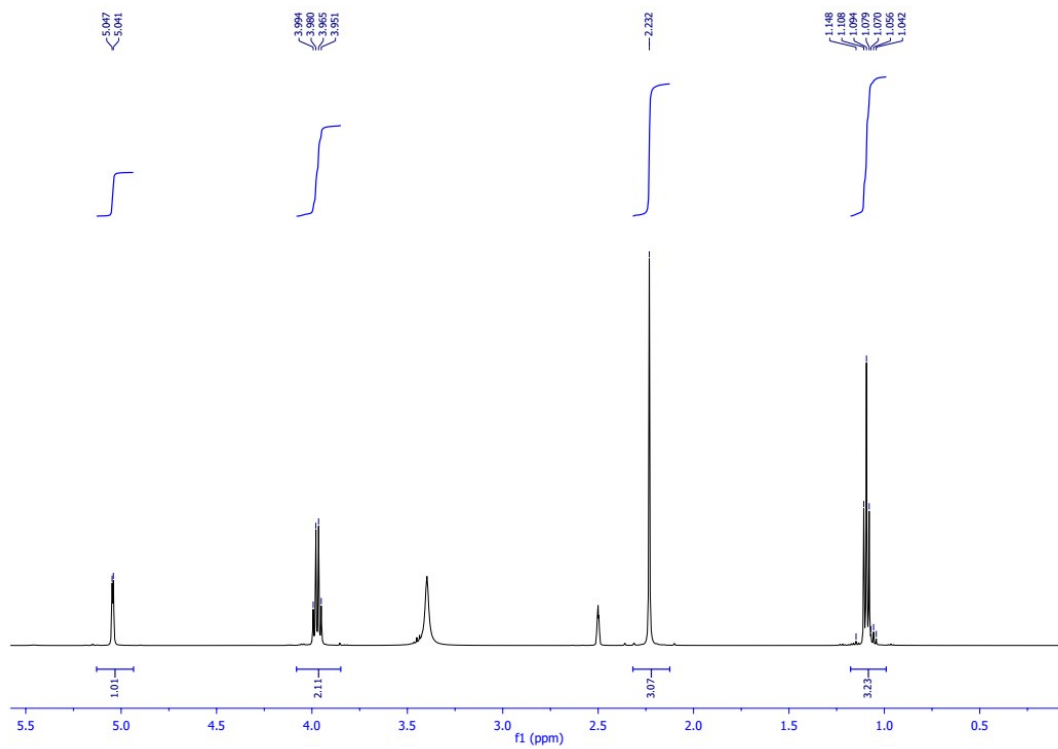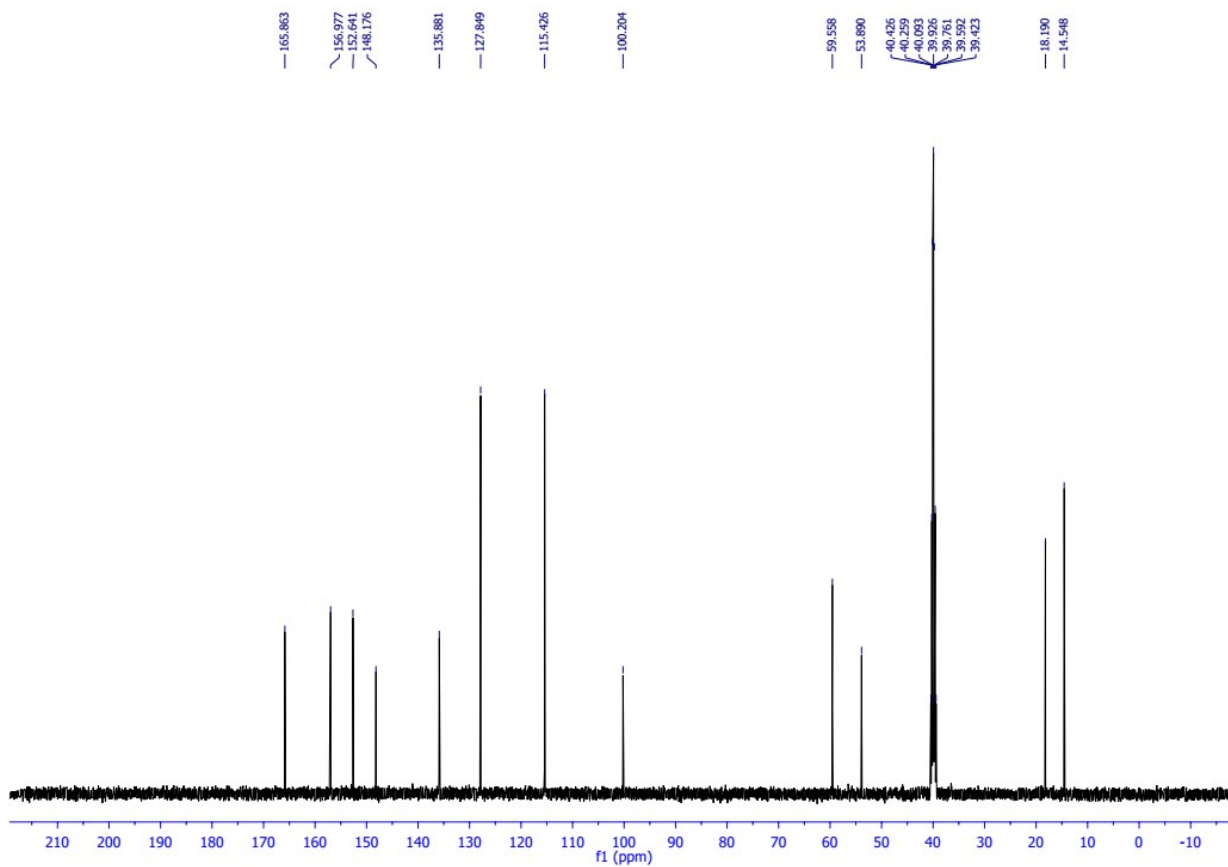

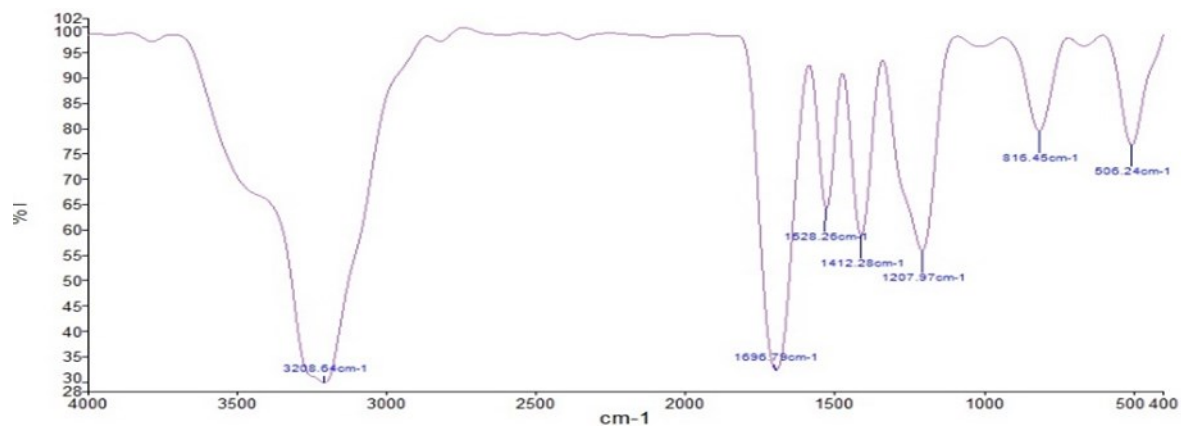

Ethyl 4-(4-(dimethylamino)phenyl)-6-methyl-2-oxo-1,2,3,4-tetrahydropyrimidine-5-carboxylate

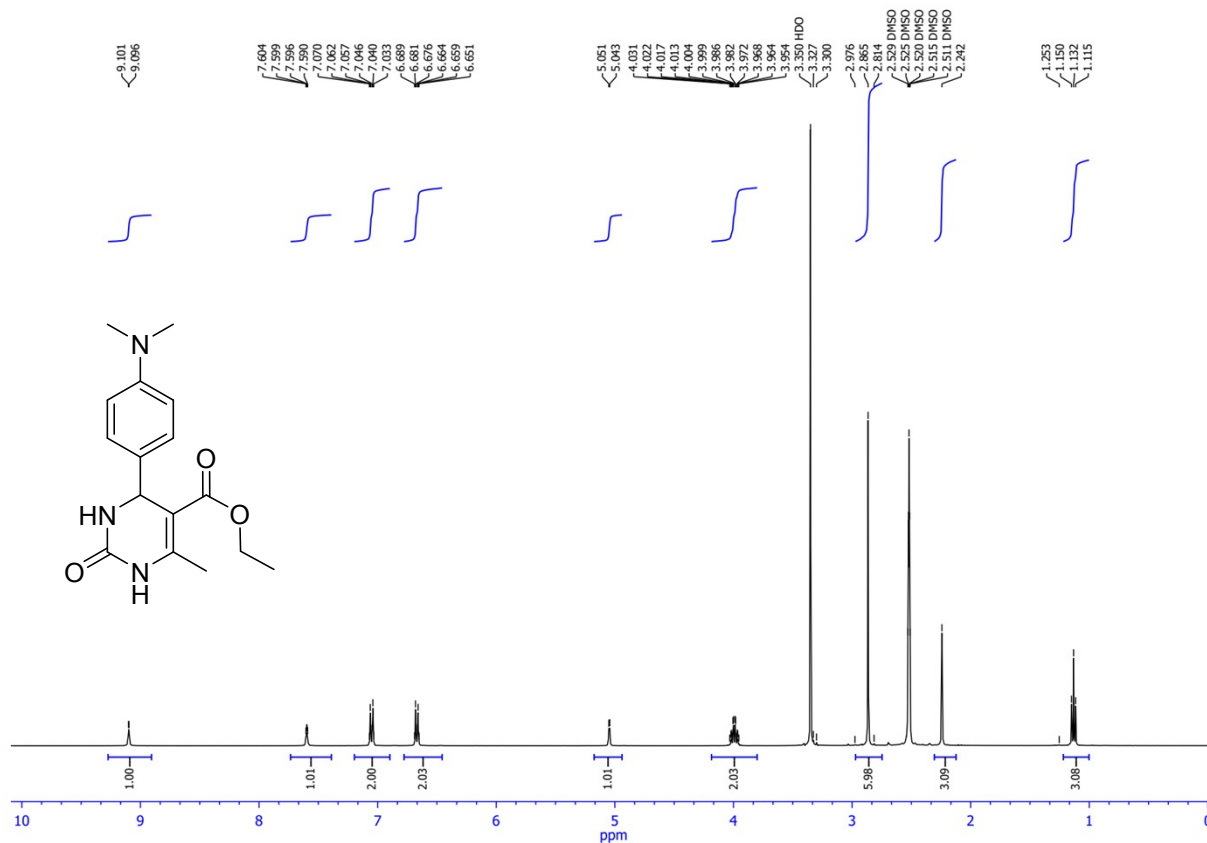

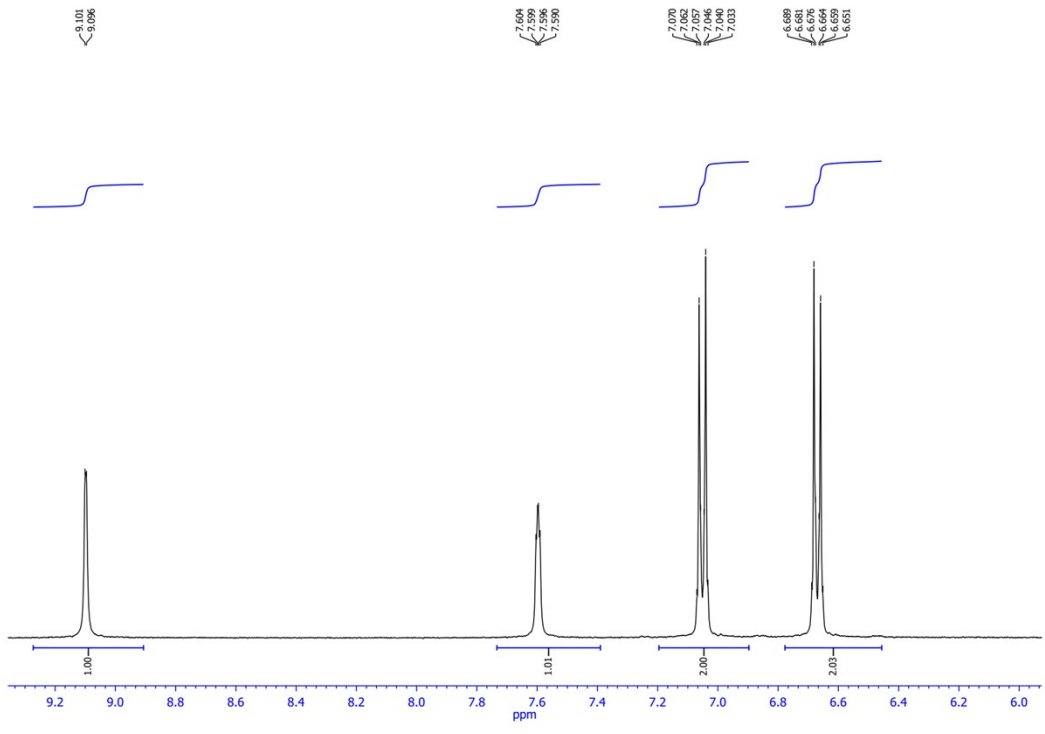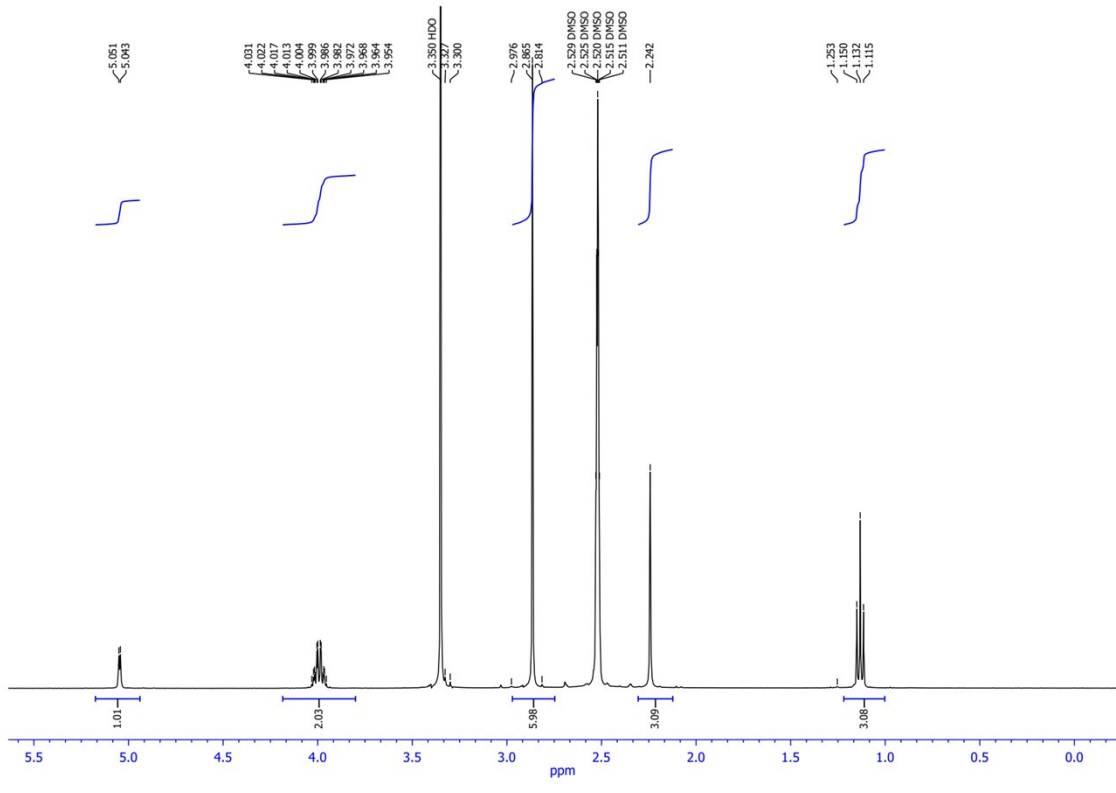



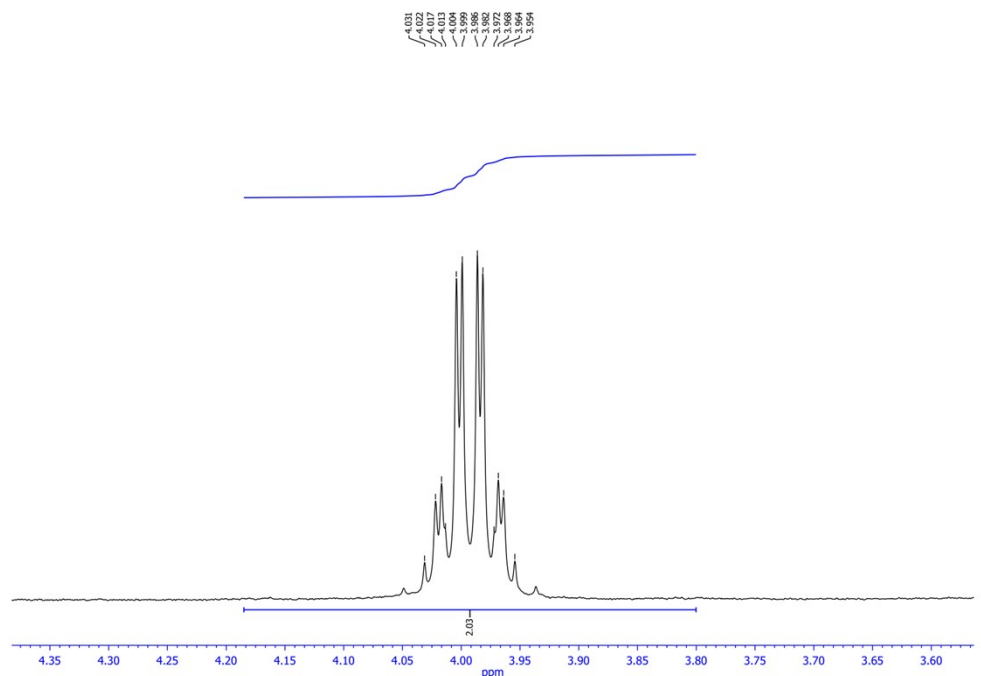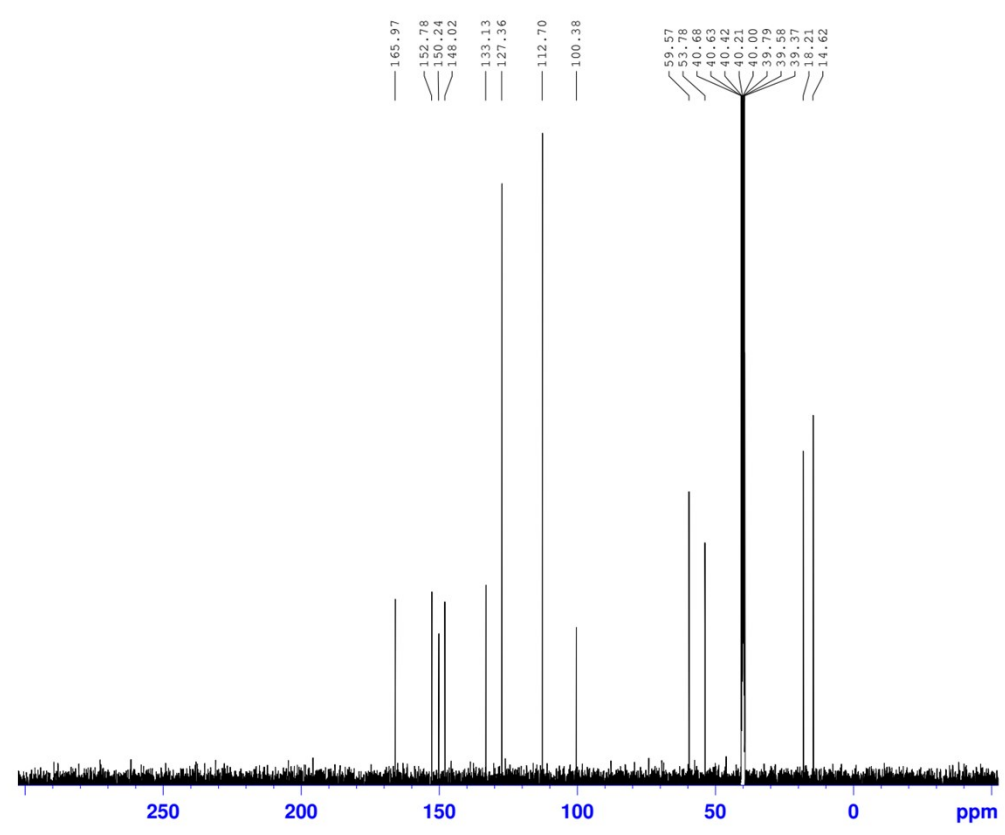

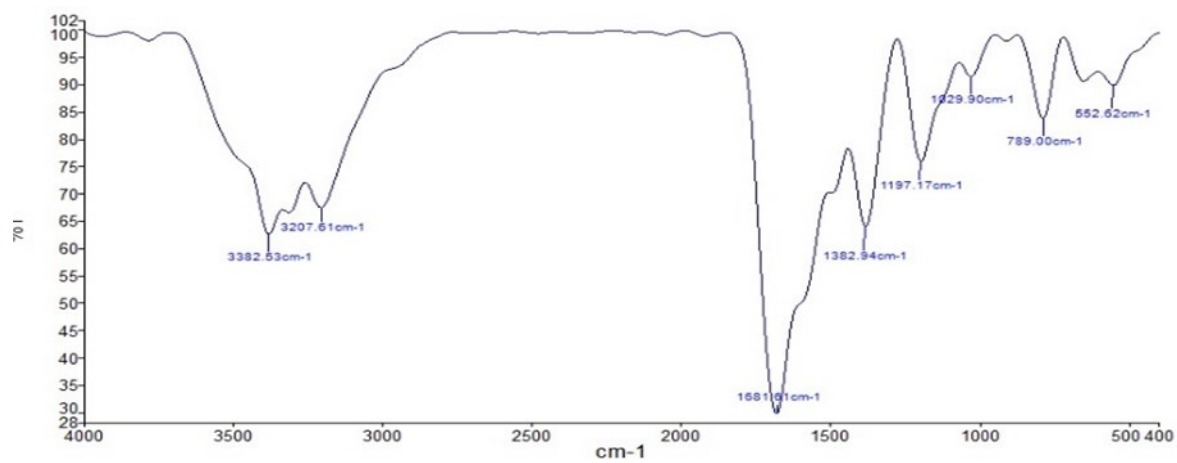

Supplement: d1ra03769b1.pdf [file d1ra03769b1.pdf]
